# Supplementary material
Source: MDPI journal article supplement (https://www.mdpi.com/2072-4292/7/5/5879)
Supplement: s1 [file s1]

*Supplementary Information*

**OPEN ACCESS**

remote sensing

**ISSN 2072-4292**

www.mdpi.com/journal/remotesensing

Article

Geostationary Satellite Observation of Precipitable Water Vapor Using an Empirical Orthogonal Function (EOF) based Reconstruction Technique over Eastern China

Man Sing Wong 1,†,*, Xiaomeng Jin 2,†, Zhizhao Liu 1, Janet Elizabeth Nichol 1, Shirong Ye 3, Peng Jiang 3 and P. W. Chan 4

1 Department of Land Surveying and Geo-Informatics, The Hong Kong Polytechnic University, Hung Hom, Kowloon, Hong Kong; E-Mails: lszzliu@polyu.edu.hk (Z.L.);
lsjanet@polyu.edu.hk (J.N.)

2 Center for Sustainability and Global Environment, Nelson Institute for Environmental Studies, University of Wisconsin-Madison, Madison, WI 53726, USA; E-Mail: xjin49@wisc.edu (X.J.);

3 GNSS Research Center, Wuhan University, 129 Luoyu Road, Wuhan 430079, China;
E-Mails: srye@whu.edu.cn (S.Y.); jiangpeng19880707@163.com (P.J.)

4 Hong Kong Observatory, Hong Kong; E-Mail: pwchan@hko.gov.hk

**†**These authors contributed equally to this work.

***** Author to whom correspondence should be addressed; E-Mail: lswong@polyu.edu.hk;
Tel.: +852-3400-8959; Fax: +852-2330-2994.

Academic Editors: Richard Gloaguen and Prasad S. Thenkabail

Received: 24 November 2014 / Accepted: 20 April 2015 / Published:

1. GPS Meteorology

Atmospheric water vapor introduces a propagation delay to GPS signals between GPS satellites and ground-based GPS receivers. This delay, namely tropospheric delay, is proportional to the amount of integrated water vapor [1]. Normally it is the tropospheric delay in the zenith direction, zenith tropospheric delay (ZTD), that is estimated together with other parameters like station positions of GPS receivers by an overall least squares inversion technique [2]. The ZTD can be decomposed into two components: zenith wet delay (ZWD) and zenith hydrostatic delay (ZHD). Since ZHD is related to atmospheric pressure at the ground, it can then be calculated using Equation (S1):

|  | (S) |
| --- | --- |

with

|  | (S) |
| --- | --- |

where Ps is the atmospheric pressure (unit: hPa); φ and H are the latitude and height (unit: m) of GPS
site [3]. Then ZWD can be calculated using Equation (S3):

|  | (S) |
| --- | --- |

The ZWD can further be converted into integrated water vapor using the following Equation (S4):

|  | (S) |
| --- | --- |

where Π is a constant that is relevant to weighted mean atmospheric temperature [4].

2. Split Window Algorithm

Chester *et al*. applied a single layer model to the atmosphere [5]. The brightness temperature observed from satellite at a given wavelength can be expressed as Equation (S5):

|  | (S) |
| --- | --- |

where T*v is the observed brightness temperature at 11 µm and 12 µm; Tsfc is surface temperature; Tair is effective atmospheric temperature; t is water vapor-absorbed transmittance. The transmittance at a given wavelength is thus expressed as:

|  | (S) |
| --- | --- |

The transmittance ratio of 11 µm band to 12 µm band can be compensated the Tsfc term:

|  | (S7) |
| --- | --- |

Transmittance is determined from the optical thickness and the cosine of zenith angle (θ). The transmittance over water vapor profile can be expressed as in Equation (S8):

|  | (S) |
| --- | --- |

where θ is the zenith angle, PWV is the total mass path of water vapor in the air, namely column-integrated water vapor. *av* is water vapor absorption coefficient representing line by line absorption. *av*’ is the water vapor absorption coefficient representing continuum absorption, which is close to the square of water vapor density. The absorption coefficient in well-mixed dry air is parameterized as the sum of a constant absorption coefficient and temperature-dependent absorption coefficient reflecting the effect of air temperature on CO2. The transmittance of dry air can thus be expressed as:

|  | (S) |
| --- | --- |

The total transmittance is the product of transmittance in the dry air and transmittance in the water vapor:

|  | (S10) |
| --- | --- |

Empirical evidence suggests the effects of second order dependence of PWV and the first order dependence of temperature are negligible when compared with other terms.

References

1 Bokoye, A.I.; Royer, A.; O’Neill, N.T.; Cliche, P.; McArthur, L.J.B.; Teillet, P.M.; Fedosejevs, G.; Thériault, J.M. Multisensor analysis of integrated atmospheric water vapor over Canada and Alaska. *J. Geophys. Res. Atmos.* **2003**, *108*, doi:10.1029/2002JD002721.

2 Collins, P.; Mireault, Y.; Heroux, P. Strategies for estimating tropospheric delays with GPS.
In Proceedings of IEEE Position Location and Navigation Symposium, Palms Springs, CA, USA, 15–18 April 2002; pp. 120–127.

3 Francois, C.; Ottle, C. Atmospheric corrections in the thermal infrared: Global and water vapor dependent Split-Window algorithms—Applications to ATSR and AVHRR data. *IEEE Trans. Geosci. Remote Sens.* **1996**, *34*, 457–470.

4 Iwabuchi, T.; Naito, I.; Mannoji, N. A comparison of Global Positioning System retrieved precipitable water vapor with the numerical weather prediction analysis data over the Japanese Islands. *J. Geophys. Res. Atmos.* **2000**, *105*, 4573–4585.

5 Chester, D.; Robinson, W.D.; Uccellini, L.W. Optimized retrievals of precipitable water from the vas split window. *J. Clim. Appl. Meteorol.* **1987**, *26*, 1059–1066.

© 2015 by the authors; licensee MDPI, Basel, Switzerland. This article is an open access article distributed under the terms and conditions of the Creative Commons Attribution license (http://creativecommons.org/licenses/by/4.0/).
